# Supplementary material
Source: PubMed Central journal article supplement (PMC6026262)
Supplement: mmc1.pdf [file mmc1.pdf]

## Anaphylaxis

*Daniel LoVerde, DO; Onyinye I. Iweala, MD, PhD; Ariana Eginli, MD; and Guha Krishnaswamy, MD, FCCP*

CHEST 2018; 153(2):528-543

*Online supplements are not copyedited prior to posting and the author(s) take full responsibility for the accuracy of all data.*

© 2017 AMERICAN COLLEGE OF CHEST PHYSICIANS. Reproduction of this article is prohibited without written permission from the American College of Chest Physicians. See online for more details. DOI: 10.1016/j.chest.2017.07.033

**e-Table 1. Anaphylaxis – A Historical Perspective**

---

|         |                                                                                                                              |
|---------|------------------------------------------------------------------------------------------------------------------------------|
| 2641 BC | Hieroglyphs show Pharaoh Menes dying from a bee sting reaction                                                               |
| 1878    | Paul Ehrlich* discovers mast cells                                                                                           |
| 1901    | Jokichi Takamine arranges to market "Adrenalin" in USA by Park, Davis and Co.                                                |
| 1902    | Paul Portier and Charles Richet* describe anaphylaxis                                                                        |
| 1903    | Nicolas Maurice Arthus describes "Localized anaphylaxis" now known as the Arthus reaction                                    |
| 1906    | Clemens Von Pirquet coins the term "Allergy" ("allos" meaning other and "ergos" meaning activity)                            |
| 1907    | Alexandre Besredka introduces the term "anaphylactic shock"                                                                  |
| 1910    | Sir Henry Dale* describes role of histamine in allergic reactions                                                            |
| 1913    | Charles Richet awarded Nobel Prize for discovery of anaphylaxis                                                              |
| 1921    | Prausnitz and Küstner transfer immediate hypersensitivity via serum                                                          |
|         | From an allergic to a non-allergic individual                                                                                |
| 1921    | Coka and Cooke introduce the term "atopy"                                                                                    |
| 1937    | Daniel Bovet* discovers antihistamines                                                                                       |
| 1944-48 | Diphenhydramine (Benadryl) and Chlorpheniramine introduced                                                                   |
| 1948    | Cortisone administered to arthritis patients with relief of symptoms                                                         |
| 1949    | Cortisone introduced for clinical use by Merck and Company                                                                   |
| 1950    | Nobel Prize awarded to Edward Kendall, Tadeus Reichstein and Philip Hench for discoveries related to adrenal corticosteroids |
| 1964    | Sir James Black* discovers H <sub>2</sub> receptor and cimetidine                                                            |
| 1966    | Kimishige and Teruko Ishizaka discover immunoglobulin E (IgE)                                                                |
| 1982    | Bengt Ingemar Samuelsson* awarded Nobel Prize for identifying leukotrienes as the "slow reacting factor of anaphylaxis"      |
| 1994    | Pork-cat syndrome and anaphylaxis to mammalian meats after cat sensitization reported                                        |
| 2008    | Chinese heparin adulterated with over-sulfated chondroitin sulfate resulting in anaphylactic reactions                       |
| 2009    | Delayed anaphylaxis to galactose-1,3-alpha-galactose in mammalian meat discovered                                            |

---

\*-seminal discoveries of relevance to anaphylaxis and its management

**e-Table 2. Mast Cell Activation Disorders and Idiopathic Anaphylaxis: Diagnostic aspects and differentiation of mast cell disorders from idiopathic anaphylaxis**

H=high levels; N=normal levels

| FINDINGS                                            | Systemic mastocytosis | Monoclonal mast cell activation syndrome | Mast cell activation syndrome | Idiopathic anaphylaxis |
|-----------------------------------------------------|-----------------------|------------------------------------------|-------------------------------|------------------------|
| Multifocal aggregates in marrow or ECT <sup>1</sup> | Yes                   | No                                       | No                            | No                     |
| D816V mutation <sup>2</sup>                         | Yes                   | Yes                                      | No                            | No                     |
| Aberrant CD25 expression on mast cells              | Yes                   | Yes                                      | No                            | No                     |
| Tryptase baseline                                   | H                     | H/N                                      | H/N                           | No                     |
| Urine 11 $\beta$ -PGF2 $\alpha$ <sup>3</sup>        | H                     | H/N                                      | H/N                           | N                      |
| Cutaneous mastocytosis                              | Yes                   | No                                       | No                            | No                     |
| Response to medication                              | Good                  | Good                                     | Good                          | Variable               |

<sup>1</sup>ECT=extra-cutaneous tissue ; <sup>2</sup>D816V= Point mutation of the KIT oncogene at codon 816 is seen in >90% of systemic mastocytosis (SM) cases; <sup>3</sup>11 $\beta$ -PGF2 $\alpha$  is an intermediate metabolite in the arachidonic acid metabolic pathway, and is irreversibly produced from prostaglandin D2  
Tissue mast cell aggregates, D816V mutation, urinary prostanoids excretion, tryptase and staining for CD25 allows syndrome differentiation of mast cell disorders and separation from idiopathic anaphylaxis
